# Supplementary material
Source: PubMed Central journal article supplement (PMC5154929)
Supplement: NIHMS821412-supplement-Supp_Table_S9.pdf [file NIHMS821412-supplement-Supp_Table_S9.pdf]

**Supplementary Table 9: Significance of 66 ROIs under joint variance (JVAR) test.** Greater significance and lower p-values under JVAR test implies ROI better characterizes  $S^+$  (n=37) as group relative to  $S^-$  (n=442) in thickness, area, and volume measurements simultaneously. (a) One-sided F-tests for ratio of variances, with 36 and 441 degrees of freedom, between the groups were performed for thickness, area, and volume variables of each respective ROI. (b) The p-value for the JVAR test statistic  $T_j = 1 - \prod_{k=1}^3 (1 - p_{jk})$  were generated through permutation distributions, as described in methods section. (c) FDR-adjusted p-values are over JVAR tests for 66 ROIs. (d) The left temporal pole had a FDR-adjusted p-value less than 0.05.

| Rank | Region of Interest           | Ratio of Variances               |       |        | JVAR Test <sup>b</sup> |         |                  |
|------|------------------------------|----------------------------------|-------|--------|------------------------|---------|------------------|
|      |                              | F-test <sup>a</sup> ( $p_{jk}$ ) |       |        | Statistic $T_j$        | p-value | FDR <sup>c</sup> |
|      |                              | Thickness                        | Area  | Volume |                        |         |                  |
| 1    | LH.temporalpole <sup>d</sup> | 0.044                            | 0.014 | 0.002  | 0.0582                 | 0.0005  | 0.035            |
| 2    | LH.lingual                   | 0.002                            | 0.033 | 0.006  | 0.0403                 | 0.0016  | 0.052            |
| 3    | RH.middletemporal            | 0.080                            | 0.228 | 0.093  | 0.3558                 | 0.0266  | 0.524            |
| 4    | LH.caudalanteriorcingulate   | 0.028                            | 0.235 | 0.109  | 0.3381                 | 0.0318  | 0.524            |
| 5    | RH.rostralanteriorcingulate  | 0.029                            | 0.074 | 0.285  | 0.3576                 | 0.0427  | 0.563            |
| 6    | LH.transversetemporal        | 0.031                            | 0.053 | 0.385  | 0.4352                 | 0.0533  | 0.586            |
| 7    | RH.transversetemporal        | 0.047                            | 0.286 | 0.220  | 0.4686                 | 0.0797  | 0.703            |
| 8    | LH.entorhinal                | 0.065                            | 0.063 | 0.372  | 0.4499                 | 0.0852  | 0.703            |
| 9    | LH.fusiform                  | 0.286                            | 0.256 | 0.244  | 0.5979                 | 0.1211  | 0.802            |
| 10   | RH.medialorbitofrontal       | 0.016                            | 0.460 | 0.284  | 0.6193                 | 0.1409  | 0.802            |
| 11   | LH.caudalmiddlefrontal       | 0.610                            | 0.017 | 0.040  | 0.6318                 | 0.1423  | 0.802            |
| 12   | LH.lateralorbitofrontal      | 0.185                            | 0.304 | 0.404  | 0.6620                 | 0.1638  | 0.802            |
| 13   | LH.superiorparietal          | 0.148                            | 0.406 | 0.273  | 0.6322                 | 0.1686  | 0.802            |
| 14   | RH.caudalmiddlefrontal       | 0.537                            | 0.132 | 0.117  | 0.6447                 | 0.1754  | 0.802            |
| 15   | RH.parstriangularis          | 0.085                            | 0.521 | 0.275  | 0.6821                 | 0.1889  | 0.802            |
| 16   | RH.paracentral               | 0.629                            | 0.010 | 0.001  | 0.6330                 | 0.2185  | 0.802            |
| 17   | LH.rostralanteriorcingulate  | 0.007                            | 0.529 | 0.393  | 0.7162                 | 0.2237  | 0.802            |
| 18   | RH.posteriorcingulate        | 0.237                            | 0.390 | 0.359  | 0.7016                 | 0.2280  | 0.802            |
| 19   | LH.pericalcarine             | 0.593                            | 0.207 | 0.203  | 0.7426                 | 0.2347  | 0.802            |
| 20   | RH.superiorparietal          | 0.563                            | 0.215 | 0.301  | 0.7602                 | 0.2614  | 0.802            |
| 21   | RH.parahippocampal           | 0.412                            | 0.031 | 0.634  | 0.7913                 | 0.2940  | 0.802            |
| 22   | RH.inferiortemporal          | 0.242                            | 0.320 | 0.623  | 0.8057                 | 0.3070  | 0.802            |
| 23   | LH.cuneus                    | 0.004                            | 0.717 | 0.229  | 0.7828                 | 0.3401  | 0.802            |
| 24   | RH.pericalcarine             | 0.569                            | 0.289 | 0.493  | 0.8447                 | 0.3588  | 0.802            |
| 25   | RH.postcentral               | 0.106                            | 0.592 | 0.452  | 0.8002                 | 0.3624  | 0.802            |
| 26   | LH.inferiorparietal          | 0.711                            | 0.165 | 0.344  | 0.8418                 | 0.3717  | 0.802            |
| 27   | RH.isthmuscingulate          | 0.685                            | 0.231 | 0.399  | 0.8546                 | 0.3731  | 0.802            |
| 28   | LH.parsopercularis           | 0.640                            | 0.171 | 0.459  | 0.8388                 | 0.3795  | 0.802            |
| 29   | LH.paracentral               | 0.757                            | 0.315 | 0.135  | 0.8562                 | 0.3871  | 0.802            |
| 30   | LH.precentral                | 0.612                            | 0.109 | 0.484  | 0.8218                 | 0.3888  | 0.802            |
| 31   | RH.fusiform                  | 0.077                            | 0.779 | 0.315  | 0.8605                 | 0.4025  | 0.802            |
| 32   | LH.medialorbitofrontal       | 0.561                            | 0.485 | 0.444  | 0.8743                 | 0.4090  | 0.802            |
| 33   | LH.rostralmiddlefrontal      | 0.419                            | 0.224 | 0.726  | 0.8764                 | 0.4260  | 0.802            |

**Supplementary Table 9: Significance of 66 ROIs under joint variance (JVAR) test.** Greater significance and lower p-values under JVAR test implies ROI better characterizes  $S^+$  (n=37) as group relative to  $S^-$  (n=442) in thickness, area, and volume measurements simultaneously. (a) One-sided F-tests for ratio of variances, with 36 and 441 degrees of freedom, between the groups were performed for thickness, area, and volume variables of each respective ROI. (b) The p-value for the JVAR test statistic  $T_j = 1 - \prod_{k=1}^3 (1 - p_{jk})$  were generated through permutation distributions, as described in methods section. (c) FDR-adjusted p-values are over JVAR tests for 66 ROIs. (d) The left temporal pole had a FDR-adjusted p-value less than 0.05.

| Rank | Region of Interest         | Ratio of Variances               |       |        | JVAR Test <sup>b</sup> |         |                  |
|------|----------------------------|----------------------------------|-------|--------|------------------------|---------|------------------|
|      |                            | F-test <sup>a</sup> ( $p_{jk}$ ) |       |        | Statistic $T_j$        | p-value | FDR <sup>c</sup> |
|      |                            | Thickness                        | Area  | Volume |                        |         |                  |
| 34   | RH.superiortemporal        | 0.831                            | 0.059 | 0.229  | 0.8775                 | 0.4280  | 0.802            |
| 35   | RH.parsopercularis         | 0.632                            | 0.391 | 0.483  | 0.8839                 | 0.4292  | 0.802            |
| 36   | RH.cuneus                  | 0.714                            | 0.247 | 0.511  | 0.8946                 | 0.4627  | 0.802            |
| 37   | LH.parstriangularis        | 0.205                            | 0.727 | 0.520  | 0.8958                 | 0.4627  | 0.802            |
| 38   | LH.bankssts                | 0.796                            | 0.253 | 0.343  | 0.8997                 | 0.4695  | 0.802            |
| 39   | RH.entorhinal              | 0.479                            | 0.372 | 0.625  | 0.8774                 | 0.4740  | 0.802            |
| 40   | RH.rostralmiddlefrontal    | 0.885                            | 0.047 | 0.203  | 0.9125                 | 0.4954  | 0.807            |
| 41   | LH.superiortemporal        | 0.855                            | 0.197 | 0.288  | 0.9170                 | 0.5016  | 0.807            |
| 42   | RH.precentral              | 0.175                            | 0.604 | 0.470  | 0.8269                 | 0.5423  | 0.816            |
| 43   | RH.temporalpole            | 0.813                            | 0.469 | 0.285  | 0.9291                 | 0.5448  | 0.816            |
| 44   | LH.inferiortemporal        | 0.862                            | 0.084 | 0.482  | 0.9343                 | 0.5486  | 0.816            |
| 45   | RH.lingual                 | 0.593                            | 0.566 | 0.605  | 0.9302                 | 0.5563  | 0.816            |
| 46   | LH.supramarginal           | 0.749                            | 0.508 | 0.522  | 0.9410                 | 0.5781  | 0.817            |
| 47   | RH.bankssts                | 0.616                            | 0.708 | 0.527  | 0.9469                 | 0.5967  | 0.817            |
| 48   | RH.parsorbitalis           | 0.360                            | 0.672 | 0.757  | 0.9490                 | 0.6015  | 0.817            |
| 49   | LH.superiorfrontal         | 0.126                            | 0.754 | 0.777  | 0.9519                 | 0.6064  | 0.817            |
| 50   | RH.frontalpole             | 0.086                            | 0.533 | 0.904  | 0.9590                 | 0.6195  | 0.818            |
| 51   | RH.lateralorbitofrontal    | 0.728                            | 0.657 | 0.600  | 0.9626                 | 0.6631  | 0.858            |
| 52   | LH.precuneus               | 0.627                            | 0.717 | 0.722  | 0.9707                 | 0.6773  | 0.860            |
| 53   | RH.precuneus               | 0.756                            | 0.545 | 0.848  | 0.9831                 | 0.7598  | 0.899            |
| 54   | RH.supramarginal           | 0.839                            | 0.643 | 0.775  | 0.9870                 | 0.7681  | 0.899            |
| 55   | RH.lateraloccipital        | 0.754                            | 0.424 | 0.913  | 0.9877                 | 0.7765  | 0.899            |
| 56   | LH.middletemporal          | 0.620                            | 0.811 | 0.746  | 0.9817                 | 0.7767  | 0.899            |
| 57   | RH.caudalanteriorcingulate | 0.811                            | 0.538 | 0.904  | 0.9916                 | 0.7837  | 0.899            |
| 58   | LH.parahippocampal         | 0.173                            | 0.476 | 0.960  | 0.9828                 | 0.7903  | 0.899            |
| 59   | LH.postcentral             | 0.685                            | 0.735 | 0.926  | 0.9938                 | 0.8180  | 0.915            |
| 60   | LH.parsorbitalis           | 0.983                            | 0.345 | 0.221  | 0.9914                 | 0.8420  | 0.926            |
| 61   | LH.isthmuscingulate        | 1.000                            | 0.194 | 0.215  | 0.9999                 | 0.9175  | 0.979            |
| 62   | LH.frontalpole             | 0.615                            | 0.402 | 0.991  | 0.9980                 | 0.9276  | 0.979            |
| 63   | LH.posteriorcingulate      | 0.784                            | 0.891 | 0.944  | 0.9987                 | 0.9343  | 0.979            |
| 64   | RH.superiorfrontal         | 0.120                            | 0.938 | 0.979  | 0.9988                 | 0.9505  | 0.980            |
| 65   | RH.inferiorparietal        | 0.443                            | 0.976 | 0.997  | 1.0000                 | 0.9853  | 0.994            |
| 66   | LH.lateraloccipital        | 0.990                            | 0.919 | 0.940  | 1.0000                 | 0.9944  | 0.994            |
