# Supplementary material
Source: PubMed Central journal article supplement (PMC5154929)
Supplement: NIHMS821412-supplement-Supp_Table_S10.pdf [file NIHMS821412-supplement-Supp_Table_S10.pdf]

**Supplementary Table 10. Marginal association tests for 198 neuroimaging variables in linear model of learning performance.** A univariate linear model of learning performance score for was fit for each of 198 neuroimaging variable as predictors over PING sample (n=479). Neuroimaging variables were uncorrelated to age, sex , handedness, first two PCs from genotype data, scanning device, and whole brain measure because their effects were removed from respective observed neuroimaging variable through multivariate linear regression. The whole brain measure was thickness, area, or volume corresponding to measurement type for each of 66 ROIs. Each p-value is under F-distribuition with 1

| Measurement Type | Neuroimaging Variable                          | Estimate | Std..Error | t.value  | p-value |
|------------------|------------------------------------------------|----------|------------|----------|---------|
| Thickness        | MRI_cort_thick.ctx.lh.bankssts                 | -0.00779 | 0.03087    | -0.25242 | 0.80083 |
| Thickness        | MRI_cort_thick.ctx.lh.caudalanteriorcingulate  | -0.01743 | 0.03086    | -0.56497 | 0.57236 |
| Thickness        | MRI_cort_thick.ctx.lh.caudalmiddlefrontal      | 0.02304  | 0.03085    | 0.74665  | 0.45564 |
| Thickness        | MRI_cort_thick.ctx.lh.cuneus                   | -0.02839 | 0.03084    | -0.92059 | 0.35773 |
| Thickness        | MRI_cort_thick.ctx.lh.entorhinal               | -0.00927 | 0.03087    | -0.30027 | 0.76410 |
| Thickness        | MRI_cort_thick.ctx.lh.fusiform                 | 0.00849  | 0.03087    | 0.27498  | 0.78345 |
| Thickness        | MRI_cort_thick.ctx.lh.inferioparietal          | -0.01609 | 0.03086    | -0.52131 | 0.60239 |
| Thickness        | MRI_cort_thick.ctx.lh.inferiortemporal         | 0.05821  | 0.03075    | 1.89259  | 0.05902 |
| Thickness        | MRI_cort_thick.ctx.lh.isthmuscingulate         | -0.02704 | 0.03084    | -0.87651 | 0.38120 |
| Thickness        | MRI_cort_thick.ctx.lh.lateraloccipital         | -0.02188 | 0.03085    | -0.70914 | 0.47858 |
| Thickness        | MRI_cort_thick.ctx.lh.lateralorbitofrontal     | -0.01418 | 0.03086    | -0.45942 | 0.64614 |
| Thickness        | MRI_cort_thick.ctx.lh.lingual                  | -0.06111 | 0.03074    | -1.98779 | 0.04741 |
| Thickness        | MRI_cort_thick.ctx.lh.medialorbitofrontal      | -0.01362 | 0.03086    | -0.44117 | 0.65929 |
| Thickness        | MRI_cort_thick.ctx.lh.middletemporal           | 0.03353  | 0.03083    | 1.08744  | 0.27739 |
| Thickness        | MRI_cort_thick.ctx.lh.parahippocampal          | 0.01363  | 0.03086    | 0.44165  | 0.65894 |
| Thickness        | MRI_cort_thick.ctx.lh.paracentral              | 0.01191  | 0.03086    | 0.38600  | 0.69967 |
| Thickness        | MRI_cort_thick.ctx.lh.parsopercularis          | -0.00016 | 0.03087    | -0.00516 | 0.99588 |
| Thickness        | MRI_cort_thick.ctx.lh.parsorbitalis            | 0.02586  | 0.03085    | 0.83822  | 0.40233 |
| Thickness        | MRI_cort_thick.ctx.lh.parstriangularis         | -0.01227 | 0.03086    | -0.39745 | 0.69121 |
| Thickness        | MRI_cort_thick.ctx.lh.pericalcarine            | -0.06472 | 0.03073    | -2.10633 | 0.03570 |
| Thickness        | MRI_cort_thick.ctx.lh.postcentral              | 0.01319  | 0.03086    | 0.42741  | 0.66927 |
| Thickness        | MRI_cort_thick.ctx.lh.posteriorcingulate       | -0.04241 | 0.03081    | -1.37665 | 0.16927 |
| Thickness        | MRI_cort_thick.ctx.lh.precentral               | 0.06558  | 0.03072    | 2.13440  | 0.03332 |
| Thickness        | MRI_cort_thick.ctx.lh.precuneus                | -0.00340 | 0.03087    | -0.11022 | 0.91228 |
| Thickness        | MRI_cort_thick.ctx.lh.rostralanteriorcingulate | -0.05944 | 0.03075    | -1.93297 | 0.05383 |
| Thickness        | MRI_cort_thick.ctx.lh.rostralmiddlefrontal     | -0.02713 | 0.03084    | -0.87953 | 0.37956 |
| Thickness        | MRI_cort_thick.ctx.lh.superiorfrontal          | -0.00666 | 0.03087    | -0.21584 | 0.82921 |
| Thickness        | MRI_cort_thick.ctx.lh.superiorparietal         | -0.03050 | 0.03084    | -0.98896 | 0.32318 |
| Thickness        | MRI_cort_thick.ctx.lh.superiortemporal         | -0.00737 | 0.03087    | -0.23892 | 0.81127 |
| Thickness        | MRI_cort_thick.ctx.lh.supramarginal            | -0.04293 | 0.03081    | -1.39368 | 0.16406 |
| Thickness        | MRI_cort_thick.ctx.lh.frontalpole              | 0.06775  | 0.03071    | 2.20597  | 0.02786 |
| Thickness        | MRI_cort_thick.ctx.lh.temporalpole             | -0.02103 | 0.03085    | -0.68165 | 0.49579 |
| Thickness        | MRI_cort_thick.ctx.lh.transversetemporal       | -0.04883 | 0.03079    | -1.58586 | 0.11343 |
| Thickness        | MRI_cort_thick.ctx.rh.bankssts                 | 0.02613  | 0.03085    | 0.84699  | 0.39743 |
| Thickness        | MRI_cort_thick.ctx.rh.caudalanteriorcingulate  | -0.04501 | 0.03080    | -1.46118 | 0.14462 |
| Thickness        | MRI_cort_thick.ctx.rh.caudalmiddlefrontal      | -0.01645 | 0.03086    | -0.53300 | 0.59428 |
| Thickness        | MRI_cort_thick.ctx.rh.cuneus                   | -0.04345 | 0.03081    | -1.41039 | 0.15907 |
| Thickness        | MRI_cort_thick.ctx.rh.entorhinal               | 0.04039  | 0.03081    | 1.31088  | 0.19053 |
| Thickness        | MRI_cort_thick.ctx.rh.fusiform                 | -0.03362 | 0.03083    | -1.09041 | 0.27609 |
| Thickness        | MRI_cort_thick.ctx.rh.inferioparietal          | -0.03048 | 0.03084    | -0.98824 | 0.32354 |
| Thickness        | MRI_cort_thick.ctx.rh.inferiortemporal         | 0.04602  | 0.03080    | 1.49412  | 0.13581 |
| Thickness        | MRI_cort_thick.ctx.rh.isthmuscingulate         | -0.00744 | 0.03087    | -0.24119 | 0.80951 |
| Thickness        | MRI_cort_thick.ctx.rh.lateraloccipital         | 0.02682  | 0.03084    | 0.86963  | 0.38494 |
| Thickness        | MRI_cort_thick.ctx.rh.lateralorbitofrontal     | 0.03657  | 0.03082    | 1.18646  | 0.23603 |

**Supplementary Table 10. Marginal association tests for 198 neuroimaging variables in linear model of learning performance.** A univariate linear model of learning performance score for was fit for each of 198 neuroimaging variable as predictors over PING sample (n=479). Neuroimaging variables were uncorrelated to age, sex , handedness, first two PCs from genotype data, scanning device, and whole brain measure because their effects were removed from respective observed neuroimaging variable through multivariate linear regression. The whole brain measure was thickness, area, or volume corresponding to measurement type for each of 66 ROIs. Each p-value is under F-distribution with 1

| Measurement Type | Neuroimaging Variable                          | Estimate | Std..Error | t.value  | p-value |
|------------------|------------------------------------------------|----------|------------|----------|---------|
| Thickness        | MRI_cort_thick.ctx.rh.lingual                  | -0.00179 | 0.03087    | -0.05796 | 0.95380 |
| Thickness        | MRI_cort_thick.ctx.rh.medialorbitofrontal      | -0.04308 | 0.03081    | -1.39839 | 0.16264 |
| Thickness        | MRI_cort_thick.ctx.rh.middletemporal           | 0.04935  | 0.03079    | 1.60286  | 0.10963 |
| Thickness        | MRI_cort_thick.ctx.rh.parahippocampal          | 0.00479  | 0.03087    | 0.15524  | 0.87670 |
| Thickness        | MRI_cort_thick.ctx.rh.paracentral              | 0.00077  | 0.03087    | 0.02499  | 0.98007 |
| Thickness        | MRI_cort_thick.ctx.rh.parsopercularis          | -0.02926 | 0.03084    | -0.94879 | 0.34321 |
| Thickness        | MRI_cort_thick.ctx.rh.parsorbitalis            | -0.00736 | 0.03087    | -0.23856 | 0.81155 |
| Thickness        | MRI_cort_thick.ctx.rh.parstriangularis         | 0.00889  | 0.03087    | 0.28813  | 0.77337 |
| Thickness        | MRI_cort_thick.ctx.rh.pericalcarine            | -0.02059 | 0.03085    | -0.66718 | 0.50498 |
| Thickness        | MRI_cort_thick.ctx.rh.postcentral              | 0.01994  | 0.03086    | 0.64633  | 0.51838 |
| Thickness        | MRI_cort_thick.ctx.rh.posteriorcingulate       | -0.04818 | 0.03079    | -1.56478 | 0.11830 |
| Thickness        | MRI_cort_thick.ctx.rh.precentral               | 0.03013  | 0.03084    | 0.97701  | 0.32906 |
| Thickness        | MRI_cort_thick.ctx.rh.precuneus                | -0.03058 | 0.03084    | -0.99159 | 0.32190 |
| Thickness        | MRI_cort_thick.ctx.rh.rostralanteriorcingulate | -0.04190 | 0.03081    | -1.35987 | 0.17451 |
| Thickness        | MRI_cort_thick.ctx.rh.rostralmiddlefrontal     | -0.01172 | 0.03086    | -0.37984 | 0.70423 |
| Thickness        | MRI_cort_thick.ctx.rh.superiorfrontal          | -0.02695 | 0.03084    | -0.87378 | 0.38268 |
| Thickness        | MRI_cort_thick.ctx.rh.superiorparietal         | 0.02694  | 0.03084    | 0.87327  | 0.38296 |
| Thickness        | MRI_cort_thick.ctx.rh.superiortemporal         | -0.01716 | 0.03086    | -0.55608 | 0.57842 |
| Thickness        | MRI_cort_thick.ctx.rh.supramarginal            | 0.05086  | 0.03078    | 1.65242  | 0.09911 |
| Thickness        | MRI_cort_thick.ctx.rh.frontalpole              | -0.02348 | 0.03085    | -0.76112 | 0.44696 |
| Thickness        | MRI_cort_thick.ctx.rh.temporalpole             | 0.04356  | 0.03080    | 1.41405  | 0.15800 |
| Thickness        | MRI_cort_thick.ctx.rh.transversetemporal       | -0.02989 | 0.03084    | -0.96909 | 0.33299 |
| Area             | MRI_cort_area.ctx.lh.bankssts                  | -0.02142 | 0.03085    | -0.69419 | 0.48790 |
| Area             | MRI_cort_area.ctx.lh.caudalanteriorcingulate   | 0.05389  | 0.03077    | 1.75137  | 0.08053 |
| Area             | MRI_cort_area.ctx.lh.caudalmiddlefrontal       | -0.01183 | 0.03086    | -0.38318 | 0.70176 |
| Area             | MRI_cort_area.ctx.lh.cuneus                    | -0.01154 | 0.03086    | -0.37379 | 0.70872 |
| Area             | MRI_cort_area.ctx.lh.entorhinal                | -0.00949 | 0.03087    | -0.30749 | 0.75861 |
| Area             | MRI_cort_area.ctx.lh.fusiform                  | -0.01188 | 0.03086    | -0.38491 | 0.70048 |
| Area             | MRI_cort_area.ctx.lh.inferiorparietal          | 0.00429  | 0.03087    | 0.13895  | 0.88955 |
| Area             | MRI_cort_area.ctx.lh.inferiortemporal          | 0.03775  | 0.03082    | 1.22482  | 0.22125 |
| Area             | MRI_cort_area.ctx.lh.isthmuscingulate          | -0.02010 | 0.03086    | -0.65156 | 0.51500 |
| Area             | MRI_cort_area.ctx.lh.lateraloccipital          | -0.00721 | 0.03087    | -0.23360 | 0.81540 |
| Area             | MRI_cort_area.ctx.lh.lateralorbitofrontal      | 0.02529  | 0.03085    | 0.81978  | 0.41275 |
| Area             | MRI_cort_area.ctx.lh.lingual                   | -0.06431 | 0.03073    | -2.09292 | 0.03688 |
| Area             | MRI_cort_area.ctx.lh.medialorbitofrontal       | -0.02545 | 0.03085    | -0.82518 | 0.40968 |
| Area             | MRI_cort_area.ctx.lh.middletemporal            | -0.00303 | 0.03087    | -0.09831 | 0.92173 |
| Area             | MRI_cort_area.ctx.lh.parahippocampal           | 0.01865  | 0.03086    | 0.60449  | 0.54581 |
| Area             | MRI_cort_area.ctx.lh.paracentral               | 0.01181  | 0.03086    | 0.38254  | 0.70223 |
| Area             | MRI_cort_area.ctx.lh.parsopercularis           | -0.00373 | 0.03087    | -0.12080 | 0.90390 |
| Area             | MRI_cort_area.ctx.lh.parsorbitalis             | -0.00119 | 0.03087    | -0.03850 | 0.96931 |
| Area             | MRI_cort_area.ctx.lh.parstriangularis          | 0.07560  | 0.03067    | 2.46454  | 0.01407 |
| Area             | MRI_cort_area.ctx.lh.pericalcarine             | -0.00936 | 0.03087    | -0.30309 | 0.76196 |
| Area             | MRI_cort_area.ctx.lh.postcentral               | 0.02777  | 0.03084    | 0.90027  | 0.36843 |
| Area             | MRI_cort_area.ctx.lh.posteriorcingulate        | -0.00437 | 0.03087    | -0.14144 | 0.88758 |

**Supplementary Table 10. Marginal association tests for 198 neuroimaging variables in linear model of learning performance.** A univariate linear model of learning performance score for was fit for each of 198 neuroimaging variable as predictors over PING sample (n=479). Neuroimaging variables were uncorrelated to age, sex , handedness, first two PCs from genotype data, scanning device, and whole brain measure because their effects were removed from respective observed neuroimaging variable through multivariate linear regression. The whole brain measure was thickness, area, or volume corresponding to measurement type for each of 66 ROIs. Each p-value is under F-distribuition with 1

| Measurement Type | Neuroimaging Variable                         | Estimate | Std..Error | t.value  | p-value |
|------------------|-----------------------------------------------|----------|------------|----------|---------|
| Area             | MRI_cort_area.ctx.lh.precentral               | 0.05441  | 0.03077    | 1.76839  | 0.07763 |
| Area             | MRI_cort_area.ctx.lh.precuneus                | -0.02058 | 0.03085    | -0.66706 | 0.50506 |
| Area             | MRI_cort_area.ctx.lh.rostralanteriorcingulate | 0.07486  | 0.03068    | 2.44010  | 0.01505 |
| Area             | MRI_cort_area.ctx.lh.rostralmiddlefrontal     | 0.04413  | 0.03080    | 1.43249  | 0.15266 |
| Area             | MRI_cort_area.ctx.lh.superiorfrontal          | -0.01595 | 0.03086    | -0.51698 | 0.60541 |
| Area             | MRI_cort_area.ctx.lh.superiorparietal         | -0.03340 | 0.03083    | -1.08324 | 0.27925 |
| Area             | MRI_cort_area.ctx.lh.superiortemporal         | -0.04462 | 0.03080    | -1.44864 | 0.14809 |
| Area             | MRI_cort_area.ctx.lh.supramarginal            | 0.00287  | 0.03087    | 0.09306  | 0.92589 |
| Area             | MRI_cort_area.ctx.lh.frontalpole              | -0.00023 | 0.03087    | -0.00753 | 0.99399 |
| Area             | MRI_cort_area.ctx.lh.temporalpole             | -0.01451 | 0.03086    | -0.47026 | 0.63838 |
| Area             | MRI_cort_area.ctx.lh.transversetemporal       | 0.00802  | 0.03087    | 0.25968  | 0.79522 |
| Area             | MRI_cort_area.ctx.rh.bankssts                 | -0.00278 | 0.03087    | -0.09011 | 0.92824 |
| Area             | MRI_cort_area.ctx.rh.caudalanteriorcingulate  | 0.02565  | 0.03085    | 0.83152  | 0.40610 |
| Area             | MRI_cort_area.ctx.rh.caudalmiddlefrontal      | -0.01284 | 0.03086    | -0.41598 | 0.67761 |
| Area             | MRI_cort_area.ctx.rh.cuneus                   | -0.02739 | 0.03084    | -0.88810 | 0.37494 |
| Area             | MRI_cort_area.ctx.rh.entorhinal               | -0.03396 | 0.03083    | -1.10143 | 0.27126 |
| Area             | MRI_cort_area.ctx.rh.fusiform                 | 0.01204  | 0.03086    | 0.38996  | 0.69674 |
| Area             | MRI_cort_area.ctx.rh.inferiorparietal         | -0.04866 | 0.03079    | -1.58060 | 0.11463 |
| Area             | MRI_cort_area.ctx.rh.inferiortemporal         | 0.03121  | 0.03084    | 1.01217  | 0.31197 |
| Area             | MRI_cort_area.ctx.rh.isthmuscingulate         | -0.00437 | 0.03087    | -0.14170 | 0.88738 |
| Area             | MRI_cort_area.ctx.rh.lateraloccipital         | -0.03545 | 0.03083    | -1.15009 | 0.25068 |
| Area             | MRI_cort_area.ctx.rh.lateralorbitofrontal     | -0.00277 | 0.03087    | -0.08986 | 0.92844 |
| Area             | MRI_cort_area.ctx.rh.lingual                  | -0.01684 | 0.03086    | -0.54586 | 0.58542 |
| Area             | MRI_cort_area.ctx.rh.medialorbitofrontal      | 0.00736  | 0.03087    | 0.23852  | 0.81158 |
| Area             | MRI_cort_area.ctx.rh.middletemporal           | 0.01300  | 0.03086    | 0.42128  | 0.67374 |
| Area             | MRI_cort_area.ctx.rh.parahippocampal          | -0.03680 | 0.03082    | -1.19390 | 0.23311 |
| Area             | MRI_cort_area.ctx.rh.paracentral              | 0.04567  | 0.03080    | 1.48301  | 0.13873 |
| Area             | MRI_cort_area.ctx.rh.parsopercularis          | 0.05247  | 0.03078    | 1.70505  | 0.08884 |
| Area             | MRI_cort_area.ctx.rh.parsorbitalis            | -0.02118 | 0.03085    | -0.68640 | 0.49279 |
| Area             | MRI_cort_area.ctx.rh.parsotriangularis        | 0.06899  | 0.03071    | 2.24659  | 0.02512 |
| Area             | MRI_cort_area.ctx.rh.pericalcarine            | -0.02020 | 0.03086    | -0.65464 | 0.51302 |
| Area             | MRI_cort_area.ctx.rh.postcentral              | -0.03990 | 0.03082    | -1.29490 | 0.19598 |
| Area             | MRI_cort_area.ctx.rh.posteriorcingulate       | 0.02610  | 0.03085    | 0.84629  | 0.39782 |
| Area             | MRI_cort_area.ctx.rh.precentral               | -0.01779 | 0.03086    | -0.57664 | 0.56445 |
| Area             | MRI_cort_area.ctx.rh.precuneus                | 0.00502  | 0.03087    | 0.16266  | 0.87085 |
| Area             | MRI_cort_area.ctx.rh.rostralanteriorcingulate | 0.00807  | 0.03087    | 0.26131  | 0.79397 |
| Area             | MRI_cort_area.ctx.rh.rostralmiddlefrontal     | 0.04565  | 0.03080    | 1.48234  | 0.13891 |
| Area             | MRI_cort_area.ctx.rh.superiorfrontal          | -0.00328 | 0.03087    | -0.10642 | 0.91530 |
| Area             | MRI_cort_area.ctx.rh.superiorparietal         | -0.00672 | 0.03087    | -0.21756 | 0.82786 |
| Area             | MRI_cort_area.ctx.rh.superiortemporal         | 0.08344  | 0.03063    | 2.72394  | 0.00669 |
| Area             | MRI_cort_area.ctx.rh.supramarginal            | -0.06908 | 0.03071    | -2.24956 | 0.02493 |
| Area             | MRI_cort_area.ctx.rh.frontalpole              | 0.03587  | 0.03083    | 1.16370  | 0.24513 |
| Area             | MRI_cort_area.ctx.rh.temporalpole             | 0.06907  | 0.03071    | 2.24930  | 0.02495 |
| Area             | MRI_cort_area.ctx.rh.transversetemporal       | 0.01832  | 0.03086    | 0.59357  | 0.55308 |

**Supplementary Table 10. Marginal association tests for 198 neuroimaging variables in linear model of learning performance.** A univariate linear model of learning performance score for was fit for each of 198 neuroimaging variable as predictors over PING sample (n=479). Neuroimaging variables were uncorrelated to age, sex , handedness, first two PCs from genotype data, scanning device, and whole brain measure because their effects were removed from respective observed neuroimaging variable through multivariate linear regression. The whole brain measure was thickness, area, or volume corresponding to measurement type for each of 66 ROIs. Each p-value is under F-distribution with 1

| Measurement Type | Neuroimaging Variable                        | Estimate | Std..Error | t.value  | p-value |
|------------------|----------------------------------------------|----------|------------|----------|---------|
| Volume           | MRI_cort_vol.ctx.lh.bankssts                 | -0.02904 | 0.03084    | -0.94165 | 0.34685 |
| Volume           | MRI_cort_vol.ctx.lh.caudalanteriorcingulate  | 0.03861  | 0.03082    | 1.25271  | 0.21093 |
| Volume           | MRI_cort_vol.ctx.lh.caudalmiddlefrontal      | -0.00190 | 0.03087    | -0.06167 | 0.95085 |
| Volume           | MRI_cort_vol.ctx.lh.cuneus                   | -0.02651 | 0.03085    | -0.85950 | 0.39050 |
| Volume           | MRI_cort_vol.ctx.lh.entorhinal               | -0.03356 | 0.03083    | -1.08837 | 0.27698 |
| Volume           | MRI_cort_vol.ctx.lh.fusiform                 | -0.00730 | 0.03087    | -0.23665 | 0.81303 |
| Volume           | MRI_cort_vol.ctx.lh.inferiorparietal         | -0.00212 | 0.03087    | -0.06868 | 0.94527 |
| Volume           | MRI_cort_vol.ctx.lh.inferiortemporal         | 0.04771  | 0.03079    | 1.54938  | 0.12195 |
| Volume           | MRI_cort_vol.ctx.lh.isthmuscingulate         | -0.02492 | 0.03085    | -0.80780 | 0.41961 |
| Volume           | MRI_cort_vol.ctx.lh.lateraloccipital         | -0.01781 | 0.03086    | -0.57706 | 0.56417 |
| Volume           | MRI_cort_vol.ctx.lh.lateralorbitofrontal     | 0.02030  | 0.03086    | 0.65784  | 0.51096 |
| Volume           | MRI_cort_vol.ctx.lh.lingual                  | -0.07368 | 0.03068    | -2.40111 | 0.01673 |
| Volume           | MRI_cort_vol.ctx.lh.medialorbitofrontal      | -0.03231 | 0.03083    | -1.04777 | 0.29528 |
| Volume           | MRI_cort_vol.ctx.lh.middletemporal           | 0.00738  | 0.03087    | 0.23922  | 0.81104 |
| Volume           | MRI_cort_vol.ctx.lh.parahippocampal          | 0.02831  | 0.03084    | 0.91785  | 0.35916 |
| Volume           | MRI_cort_vol.ctx.lh.paracentral              | 0.00995  | 0.03087    | 0.32220  | 0.74744 |
| Volume           | MRI_cort_vol.ctx.lh.parsopercularis          | -0.00327 | 0.03087    | -0.10584 | 0.91575 |
| Volume           | MRI_cort_vol.ctx.lh.parsorbitalis            | 0.02792  | 0.03084    | 0.90529  | 0.36577 |
| Volume           | MRI_cort_vol.ctx.lh.parstriangularis         | 0.07781  | 0.03066    | 2.53743  | 0.01148 |
| Volume           | MRI_cort_vol.ctx.lh.pericalcarine            | -0.02404 | 0.03085    | -0.77914 | 0.43628 |
| Volume           | MRI_cort_vol.ctx.lh.postcentral              | 0.01998  | 0.03086    | 0.64742  | 0.51767 |
| Volume           | MRI_cort_vol.ctx.lh.posteriorcingulate       | -0.00731 | 0.03087    | -0.23686 | 0.81286 |
| Volume           | MRI_cort_vol.ctx.lh.precentral               | 0.07684  | 0.03067    | 2.50564  | 0.01256 |
| Volume           | MRI_cort_vol.ctx.lh.precuneus                | -0.01199 | 0.03086    | -0.38852 | 0.69781 |
| Volume           | MRI_cort_vol.ctx.lh.rostralanteriorcingulate | 0.03953  | 0.03082    | 1.28274  | 0.20020 |
| Volume           | MRI_cort_vol.ctx.lh.rostralmiddlefrontal     | 0.02548  | 0.03085    | 0.82609  | 0.40917 |
| Volume           | MRI_cort_vol.ctx.lh.superiorfrontal          | -0.02530 | 0.03085    | -0.82012 | 0.41256 |
| Volume           | MRI_cort_vol.ctx.lh.superiorparietal         | -0.05522 | 0.03077    | -1.79478 | 0.07332 |
| Volume           | MRI_cort_vol.ctx.lh.superiortemporal         | -0.04838 | 0.03079    | -1.57129 | 0.11678 |
| Volume           | MRI_cort_vol.ctx.lh.supramarginal            | -0.01716 | 0.03086    | -0.55592 | 0.57852 |
| Volume           | MRI_cort_vol.ctx.lh.frontalpole              | 0.01920  | 0.03086    | 0.62214  | 0.53415 |
| Volume           | MRI_cort_vol.ctx.lh.temporalpole             | -0.01120 | 0.03087    | -0.36271 | 0.71698 |
| Volume           | MRI_cort_vol.ctx.lh.transversetemporal       | -0.01129 | 0.03087    | -0.36573 | 0.71473 |
| Volume           | MRI_cort_vol.ctx.rh.bankssts                 | -0.00492 | 0.03087    | -0.15945 | 0.87338 |
| Volume           | MRI_cort_vol.ctx.rh.caudalanteriorcingulate  | 0.00611  | 0.03087    | 0.19797  | 0.84315 |
| Volume           | MRI_cort_vol.ctx.rh.caudalmiddlefrontal      | -0.01698 | 0.03086    | -0.55027 | 0.58239 |
| Volume           | MRI_cort_vol.ctx.rh.cuneus                   | -0.03772 | 0.03082    | -1.22393 | 0.22158 |
| Volume           | MRI_cort_vol.ctx.rh.entorhinal               | -0.01670 | 0.03086    | -0.54115 | 0.58866 |
| Volume           | MRI_cort_vol.ctx.rh.fusiform                 | 0.00320  | 0.03087    | 0.10368  | 0.91747 |
| Volume           | MRI_cort_vol.ctx.rh.inferiorparietal         | -0.05965 | 0.03075    | -1.93992 | 0.05298 |
| Volume           | MRI_cort_vol.ctx.rh.inferiortemporal         | 0.03843  | 0.03082    | 1.24706  | 0.21299 |
| Volume           | MRI_cort_vol.ctx.rh.isthmuscingulate         | 0.00614  | 0.03087    | 0.19907  | 0.84229 |
| Volume           | MRI_cort_vol.ctx.rh.lateraloccipital         | -0.01273 | 0.03086    | -0.41243 | 0.68021 |
| Volume           | MRI_cort_vol.ctx.rh.lateralorbitofrontal     | 0.02048  | 0.03086    | 0.66374  | 0.50718 |

**Supplementary Table 10. Marginal association tests for 198 neuroimaging variables in linear model of learning performance.** A univariate linear model of learning performance score for was fit for each of 198 neuroimaging variable as predictors over PING sample (n=479). Neuroimaging variables were uncorrelated to age, sex , handedness, first two PCs from genotype data, scanning device, and whole brain measure because their effects were removed from respective observed neuroimaging variable through multivariate linear regression. The whole brain measure was thickness, area, or volume corresponding to measurement type for each of 66 ROIs. Each p-value is under F-distribution with 1

| Measurement Type | Neuroimaging Variable                        | Estimate | Std..Error | t.value  | p-value |
|------------------|----------------------------------------------|----------|------------|----------|---------|
| Volume           | MRI_cort_vol.ctx.rh.lingual                  | -0.00353 | 0.03087    | -0.11428 | 0.90906 |
| Volume           | MRI_cort_vol.ctx.rh.medialorbitofrontal      | -0.01032 | 0.03087    | -0.33443 | 0.73820 |
| Volume           | MRI_cort_vol.ctx.rh.middletemporal           | 0.02399  | 0.03085    | 0.77776  | 0.43710 |
| Volume           | MRI_cort_vol.ctx.rh.parahippocampal          | -0.03688 | 0.03082    | -1.19648 | 0.23210 |
| Volume           | MRI_cort_vol.ctx.rh.paracentral              | 0.03947  | 0.03082    | 1.28090  | 0.20085 |
| Volume           | MRI_cort_vol.ctx.rh.parsopercularis          | 0.04461  | 0.03080    | 1.44841  | 0.14816 |
| Volume           | MRI_cort_vol.ctx.rh.parsorbitalis            | -0.03113 | 0.03084    | -1.00965 | 0.31317 |
| Volume           | MRI_cort_vol.ctx.rh.parstriangularis         | 0.07146  | 0.03070    | 2.32795  | 0.02033 |
| Volume           | MRI_cort_vol.ctx.rh.pericalcarine            | -0.00927 | 0.03087    | -0.30029 | 0.76409 |
| Volume           | MRI_cort_vol.ctx.rh.postcentral              | -0.02517 | 0.03085    | -0.81585 | 0.41499 |
| Volume           | MRI_cort_vol.ctx.rh.posteriorcingulate       | 0.00896  | 0.03087    | 0.29042  | 0.77162 |
| Volume           | MRI_cort_vol.ctx.rh.precentral               | -0.00429 | 0.03087    | -0.13901 | 0.88950 |
| Volume           | MRI_cort_vol.ctx.rh.precuneus                | -0.00758 | 0.03087    | -0.24560 | 0.80609 |
| Volume           | MRI_cort_vol.ctx.rh.rostralanteriorcingulate | -0.01075 | 0.03087    | -0.34821 | 0.72784 |
| Volume           | MRI_cort_vol.ctx.rh.rostralmiddlefrontal     | 0.04734  | 0.03079    | 1.53723  | 0.12490 |
| Volume           | MRI_cort_vol.ctx.rh.superiorfrontal          | -0.00012 | 0.03087    | -0.00392 | 0.99687 |
| Volume           | MRI_cort_vol.ctx.rh.superiorparietal         | -0.00615 | 0.03087    | -0.19929 | 0.84212 |
| Volume           | MRI_cort_vol.ctx.rh.superiortemporal         | 0.05690  | 0.03076    | 1.84990  | 0.06495 |
| Volume           | MRI_cort_vol.ctx.rh.supramarginal            | -0.04364 | 0.03080    | -1.41663 | 0.15725 |
| Volume           | MRI_cort_vol.ctx.rh.frontalpole              | 0.02388  | 0.03085    | 0.77416  | 0.43922 |
| Volume           | MRI_cort_vol.ctx.rh.temporalpole             | 0.06003  | 0.03075    | 1.95253  | 0.05146 |
| Volume           | MRI_cort_vol.ctx.rh.transversetemporal       | 0.01130  | 0.03087    | 0.36603  | 0.71451 |
